# Supplementary material for: Incidence of and Factors Associated With Nonfatal Self-injury After a Cancer Diagnosis in Ontario, Canada
Source: PubMed Central journal article supplement (PMC8463938; doi:10.1001/jamanetworkopen.2021.26822), 2021-09-24
Supplement: jamanetwopen-e2126822-s001.pdf [file jamanetwopen-e2126822-s001.pdf]

## Supplemental Online Content

Noel CW, Eskander A, Sutradhar R, et al; the Enhanced Supportive Psycho-oncology Canadian Care (ESPOC) Group. Incidence of and factors associated with nonfatal self-injury after a cancer diagnosis in Ontario, Canada. *JAMA Netw Open*. 2021;4(9):e2126822. doi:10.1001/jamanetworkopen.2021.26822

**eTable 1.** Data Sources

**eTable 2.** Strategy for Cohort Creation

**eTable 3.** Main Variable Definitions Using Ontario Health Care Databases

**eTable 4 .** Factors Associated With Nonfatal Self-injury Events After Cancer Diagnosis Including Cancer Stage Data in Cancer Types With Most Complete Stage Information, Fine-Gray Subdistribution Model Accounting

**eFigure 1.** Flowchart of Cohort Creation

**eFigure 2.** Distribution of Time From Date of Cancer Diagnosis to Nonfatal Self-injury Event

This supplemental material has been provided by the authors to give readers additional information about their work.

| <b>eTable 1. Data Sources</b>                             |                                                                                                                                                                                                                                                                                                                                                                                                                                            |
|-----------------------------------------------------------|--------------------------------------------------------------------------------------------------------------------------------------------------------------------------------------------------------------------------------------------------------------------------------------------------------------------------------------------------------------------------------------------------------------------------------------------|
| <b>Database</b>                                           | <b>Description</b>                                                                                                                                                                                                                                                                                                                                                                                                                         |
| <b>Ontario Cancer Registry (OCR)</b>                      | The OCR is a passive, provincial registry all incident cancer diagnoses in Ontario. It includes 96% of cancer diagnoses in the province. Information included in the registry: cancer topography and morphology/histology, and details on diagnosis (e.g., types of contributing information to the diagnosis, dates).                                                                                                                     |
| <b>Activity Level Report (ALR) of Cancer Care Ontario</b> | Cancer Care Ontario maintains a database of cancers-specific services, including consultations, chemotherapy, and radiotherapy provided by regional cancer centres in the province. Because all radiotherapy is delivered at RCCs, it is a complete source of information. However, because not all cancer patients who receive surgery or chemotherapy visit an RCC, it cannot be used as a population data sources for those treatments. |
| <b>Registered Patient Database (RPDB)</b>                 | The RPDB is an ICES database derived from all administrative data sources and provides demographic data including age, patient residence, vital status, date of last contact with the healthcare system, and OHIP eligibility.                                                                                                                                                                                                             |
| <b>Ontario Registrar General (ORG)</b>                    | The ORG contains gold standard vital status data for all Ontarians. According to the Vital Statistics Act, it is mandatory to register all deaths occurring in the province.                                                                                                                                                                                                                                                               |
| <b>Ontario Marginalization Index (ONMARG)</b>             | The ON-MARG is a specialized database using Census data to profile relative area-level marginalization dependency, deprivation, ethnic concentration, and instability at various geographic levels in Ontario.                                                                                                                                                                                                                             |
| <b>Ontario Health Insurance Plan (OHIP)</b>               | The OHIP database contains all physician billing data including information on diagnoses as well as services provided, such as receipt of surgery, chemotherapy, and radiotherapy.                                                                                                                                                                                                                                                         |
| <b>National Ambulatory Care Reporting System (NACRS)</b>  | The NACRS collects data elements describing emergency health services provided by EDs in Ontario, including diagnoses, procedures, and administrative information such as wait times.                                                                                                                                                                                                                                                      |
| <b>Ontario Drug Benefit Database (ODB)</b>                | The ODB contains all information for prescription drug dispensed by community pharmacies and long-term care/nursing facilities. It covers all seniors ( $\geq 65$ years old) and individuals on social assistance for all prescriptions listed on the provincial formulary.                                                                                                                                                                |
| <b>Ontario Mental Health Reporting System (OMHRS)</b>     | The OMHRS collects information from adult psychiatric hospital admissions in Ontario.                                                                                                                                                                                                                                                                                                                                                      |

| <b>eTable 2. Strategy for Cohort Creation</b> |                                                                                                                                                                                                                                                                                                                                                                                                                                                                                                                                            |
|-----------------------------------------------|--------------------------------------------------------------------------------------------------------------------------------------------------------------------------------------------------------------------------------------------------------------------------------------------------------------------------------------------------------------------------------------------------------------------------------------------------------------------------------------------------------------------------------------------|
| <b>Cancer site</b>                            | <b>ICD.O-3 code</b>                                                                                                                                                                                                                                                                                                                                                                                                                                                                                                                        |
| Bronchopulmonary:                             | C30.0 to 34.9, C38.1 to 39.9                                                                                                                                                                                                                                                                                                                                                                                                                                                                                                               |
| Bone, Sarcoma, and PNS:                       | C47                                                                                                                                                                                                                                                                                                                                                                                                                                                                                                                                        |
| Breast:                                       | C50.0 to 50.9                                                                                                                                                                                                                                                                                                                                                                                                                                                                                                                              |
| CNS:                                          | C71, C72, C70                                                                                                                                                                                                                                                                                                                                                                                                                                                                                                                              |
| Endocrine:                                    | C73, C74, C75                                                                                                                                                                                                                                                                                                                                                                                                                                                                                                                              |
| Gastro-intestinal:                            | C15.0-15.9, C16.0-C16.9, C22.0, C22.1, C23.9, C24.0, C24.1, C24.8, C24.9, C25.0-25.9, C17.0-17.9, C18.0-C18.9, C21                                                                                                                                                                                                                                                                                                                                                                                                                         |
| Genito-urinary:                               | C64.9, C65.9, C66.9, C67, C68, C67.0-C67.9, C61, C74.0, C74.1, C74.9, C60, C62                                                                                                                                                                                                                                                                                                                                                                                                                                                             |
| Gynecologic:                                  | C52.9, C53.0, C53.1, C53.8, C53.9, C54.0, C54.1, C54.2, C54.3, C54.8, C54.9, C55.9, C56.9, C57.0, C57.1, C57.2, C57.3, C57.4, C57.7, C57.8, C57.9, C51.0, 51.1, C51.2, C51.8, C51.9                                                                                                                                                                                                                                                                                                                                                        |
| Haematopoietic and lymphoma:                  | C77, C0 to C80 with histology code 959* to 972*                                                                                                                                                                                                                                                                                                                                                                                                                                                                                            |
| Head and Neck:                                | C10.0, C10.1, C10.2, C10.3, C10.4, C10.8, C10.9, C01.9, C02.0, C02.1, C02.2, C02.3, C02.4, C02.8, C02.9, C03.0, C03.1, C03.9, C04.0, C04.1, C04.8, C04.9, C05.0, C05.1, C05.2, C05.8, C05.9, C06.0, C06.1, C06.2, C06.8, C06.9, C07.9, C08.0, C08.1, C08.8, C08.9, C09.0, C09.1, 09.8, C09.9, C11.0, C11.1, C11.2, C11.3, C11.8, C11.9, C12.9, C14.0, C14.2, C14.8, C76.0, C06.9, C14.8, C32.0, C32.1, C32.3, C32.8, C32.9, C13.0, C13.1, C13.2, C13.8, C13.9, C00.0, C00.1, C00.2, C00.3, C00.4, C00.5, C00.6, C00.8, C00.9, C14.8, C44.0 |
| Skin:                                         | C44.2 to C 44.9                                                                                                                                                                                                                                                                                                                                                                                                                                                                                                                            |

| <b>eTable 3. Main Variable Definitions Using Ontario Health Care Databases</b> |                                                                                              |                                                                                                                                                                                                                                                                                                                                                                                                                                                                                                                                                                                                      |
|--------------------------------------------------------------------------------|----------------------------------------------------------------------------------------------|------------------------------------------------------------------------------------------------------------------------------------------------------------------------------------------------------------------------------------------------------------------------------------------------------------------------------------------------------------------------------------------------------------------------------------------------------------------------------------------------------------------------------------------------------------------------------------------------------|
| <b>Variable</b>                                                                | <b>Data source</b>                                                                           | <b>Code strategy</b>                                                                                                                                                                                                                                                                                                                                                                                                                                                                                                                                                                                 |
| Age at cancer diagnosis                                                        | Ontario Cancer Registry (OCR)                                                                | Categorical: 18-39, 40-49, 50-59, 60-69, $\geq 70$                                                                                                                                                                                                                                                                                                                                                                                                                                                                                                                                                   |
| Sex                                                                            | Registered Person Database (RPDB)                                                            | - Male<br>- Female                                                                                                                                                                                                                                                                                                                                                                                                                                                                                                                                                                                   |
| Prior Self-Injury                                                              | NACRS                                                                                        | See outcome definition: yes, no                                                                                                                                                                                                                                                                                                                                                                                                                                                                                                                                                                      |
| Material Deprivation                                                           | Canadian Census RPDB<br>Ontario Marginalization index (ONMarg)                               | Measure of the inability for individuals or households to afford goods or activities typical in a society at a given time – captured in quintiles.                                                                                                                                                                                                                                                                                                                                                                                                                                                   |
| Comorbidity Burden                                                             | CIHI-Discharge abstract database (DAD)<br>CIHI – Same day surgery (SDS) OHIP                 | Elixhauser score based on health services use with a 24-month look-back window prior to the date of cancer diagnosis<br>- High: sum score $\geq 4$<br>- Low: sum score $< 4$                                                                                                                                                                                                                                                                                                                                                                                                                         |
| Rural Residence                                                                | RPDB                                                                                         | Rural index of Ontario<br>- Rural: $\geq 40$<br>- Urban: $< 40$                                                                                                                                                                                                                                                                                                                                                                                                                                                                                                                                      |
| Severe Psychiatric Illness History                                             | CIHI-DAD<br>Ontario Mental Health Reporting System (OMHRS)<br>Ontario Health Insurance Plane | <u>Inpatient</u> : any CIHI-DAD or OMHRS admission with eligible mental health diagnoses codes (see list below)<br><u>Outpatient</u> : $\geq 2$ psychiatry outpatient visit OR ED visit with eligible mental health (see list below) diagnoses codes<br><u>Other mental health services</u> : $< 2$ psychiatry visits or ED visit with any mental health diagnoses codes or any family doctor visit with any mental health diagnoses codes<br><u>None</u> : all others<br><br>OHIP (ICD-9): 295-298, 311<br>CIHI-DAD((ICD-10): F20-29; F30-39<br>OMHRS (DSM-IV): Mood disorder, Schizophrenia, other |
| Cancer Site                                                                    | OCR                                                                                          | <u>See Supplemental Table 2</u>                                                                                                                                                                                                                                                                                                                                                                                                                                                                                                                                                                      |
| Cancer Stage                                                                   | OCR                                                                                          | <u>Cancer stage at diagnosis using TNM system according to 7<sup>th</sup> edition of the AJCC:</u><br>- <u>I</u><br>- <u>II</u><br>- <u>III</u><br>- <u>IV</u><br>- <u>Missing/unknown</u>                                                                                                                                                                                                                                                                                                                                                                                                           |

**eTable 4. Factors Associated With Nonfatal Self-injury Events After Cancer Diagnosis Including Cancer Stage Data in Cancer Types With Most Complete Stage Information, (Fine-Gray Subdistribution Model Accounting**

| Variable                                                                |                         | sHR*  | [95% CI]     |
|-------------------------------------------------------------------------|-------------------------|-------|--------------|
| <b>Age category</b><br>(ref= $\geq 70$ or older)                        | 18-39                   | 4.51  | [3.21-6.35]  |
|                                                                         | 40-49                   | 3.84  | [3.04-4.85]  |
|                                                                         | 50-59                   | 2.66  | [2.20-3.22]  |
|                                                                         | 60-69                   | 1.75  | [1.45-2.10]  |
| <b>Sex</b><br>(ref=Male)                                                | Female                  | 1.02  | [0.84-1.23]  |
| <b>Rural residence</b><br>(ref=Urban)                                   | Rural                   | 1.11  | [0.89-1.37]  |
| <b>Deprivation Quintile</b><br>(ref=Q3)                                 | 1 (most deprived)       | 0.86  | [0.68-1.07]  |
|                                                                         | 2                       | 0.92  | [0.74-1.14]  |
|                                                                         | 4                       | 1.15  | [0.94-1.41]  |
|                                                                         | 5 (least deprived)      | 1.31  | [1.07-1.59]  |
| <b>High comorbidity burden</b> (Elixhauser $\geq 4$ )<br>(ref=low (<4)) |                         | 1.63  | [1.31-2.02]  |
| <b>Severe Psychiatric Illness History</b><br>(ref=none)                 | Inpatient               | 21.38 | [16.97-26.9] |
|                                                                         | Outpatient              | 8.93  | [7.04-11.4]  |
|                                                                         | Other                   | 2.20  | [1.89-2.56]  |
| <b>Cancer site</b><br>(ref=Broncho-pulmonary)                           | Breast                  | 0.83  | [0.66-1.05]  |
|                                                                         | Colo-rectal and enteric | 0.93  | [0.76-1.13]  |
|                                                                         | Prostate                | 0.95  | [0.75-1.20]  |
| <b>Cancer stage</b><br>(ref=I)                                          | 0                       | 0.62  | [0.15-2.49]  |
|                                                                         | II                      | 0.86  | [0.72-1.03]  |
|                                                                         | III                     | 0.91  | [0.74-1.11]  |
|                                                                         | IV                      | 0.61  | [0.48-0.78]  |
|                                                                         | Missing                 | 0.93  | [0.74-1.17]  |
|                                                                         |                         |       |              |

\*Adjusted for year of diagnosis

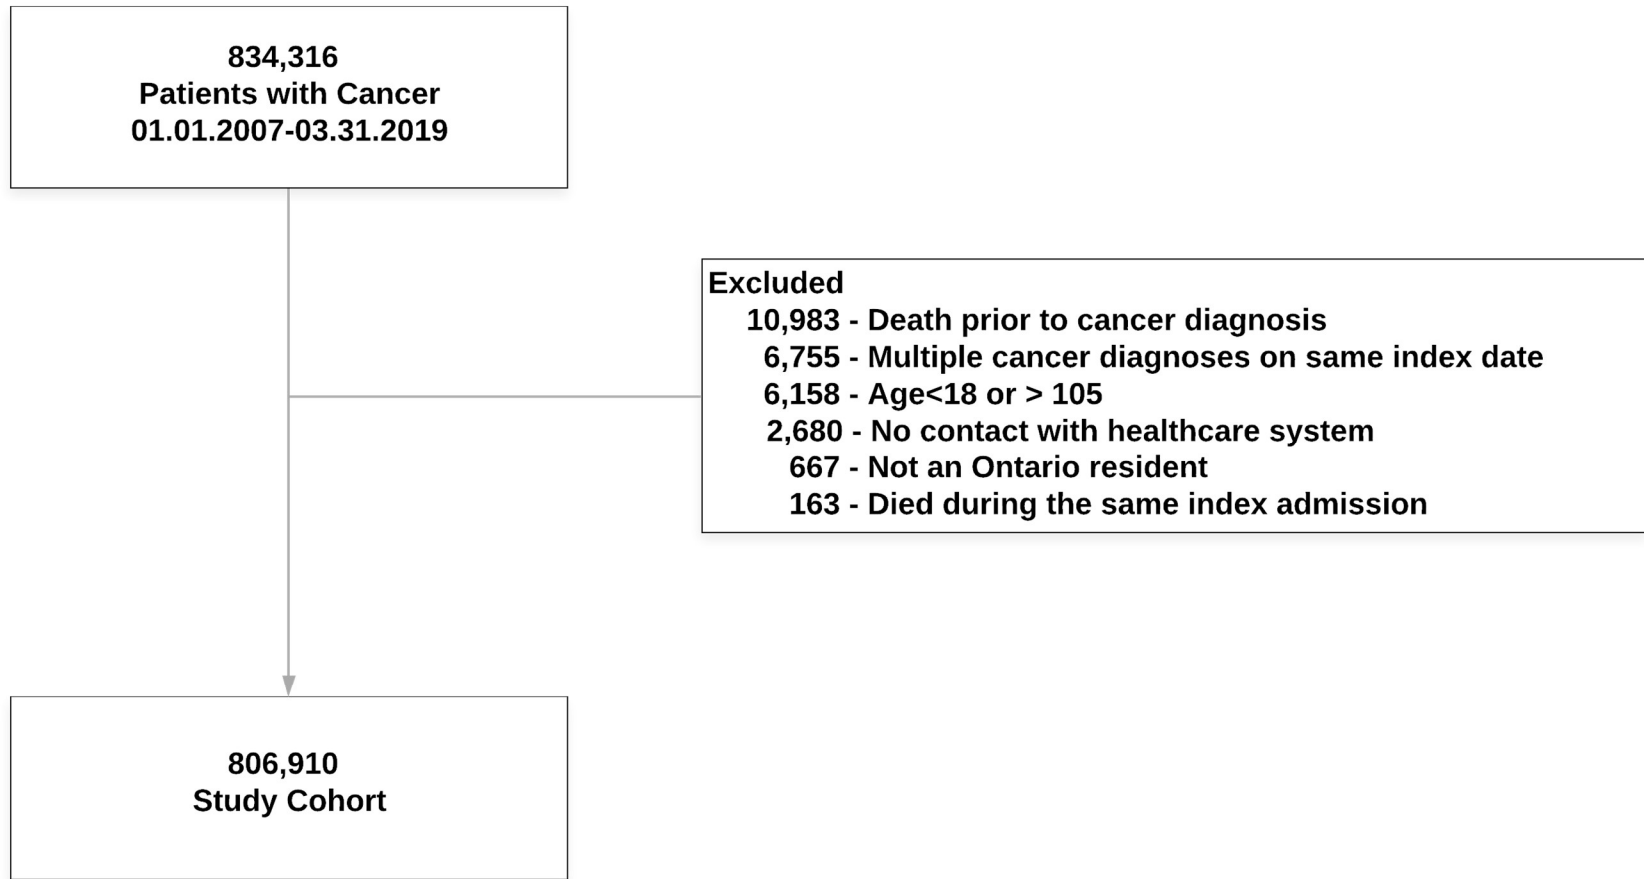

**eFigure 1. Flowchart of Cohort Creation**

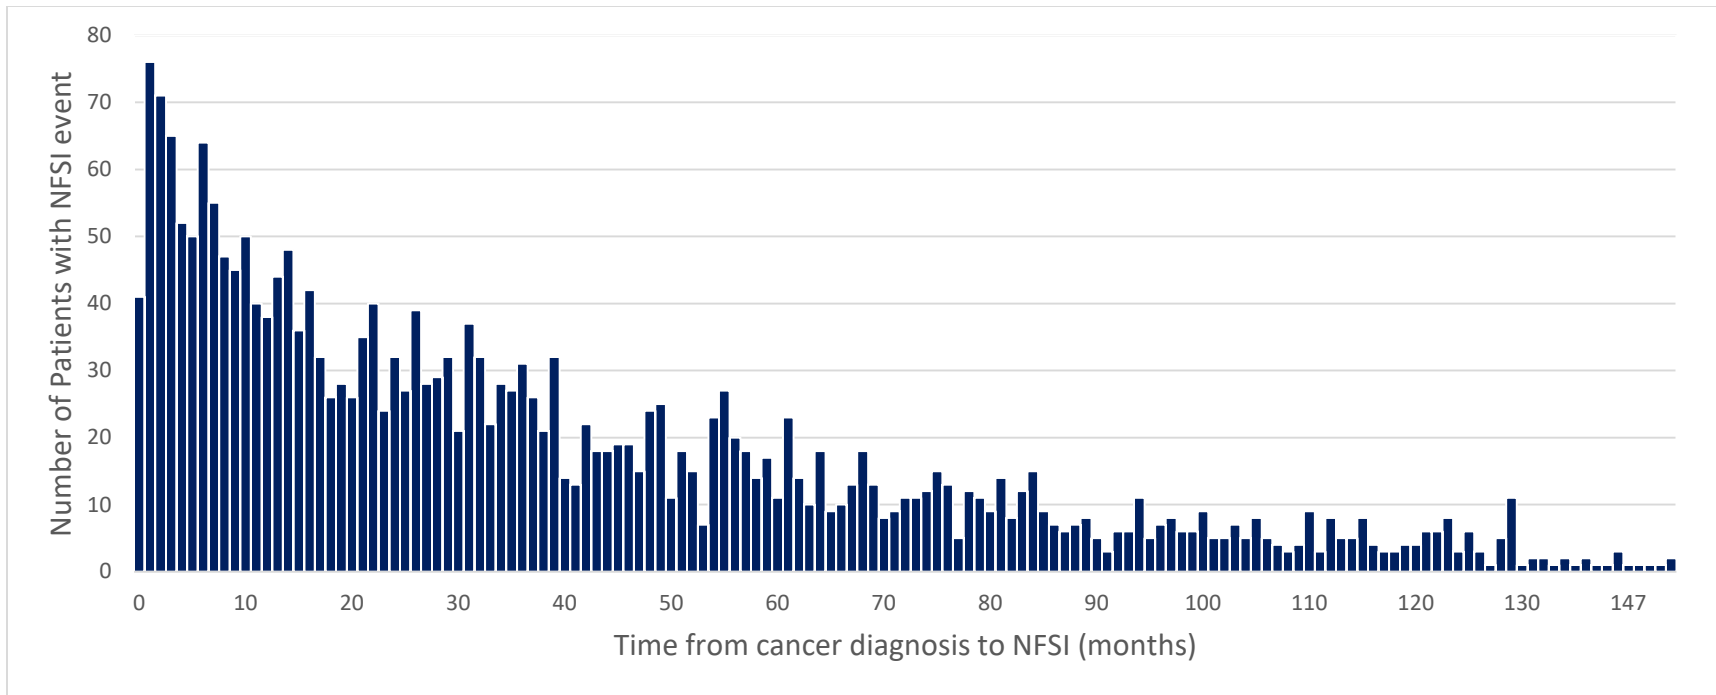

**Figure 2. Distribution of Time From Date of Cancer Diagnosis to Nonfatal Self-injury (NFSI) Event**
