# Supplementary material for: Incidence of and Factors Associated With Nonfatal Self-injury After a Cancer Diagnosis in Ontario, Canada
Source: PubMed Central journal article supplement (PMC8463938; doi:10.1001/jamanetworkopen.2021.26822), 2021-09-24
Supplement: jamanetwopen-e2126822-s002.pdf [file jamanetwopen-e2126822-s002.pdf]

\*Indicates required information. Only first name, last name, and suffix will appear in PubMed.

| <b>*Group Name(s): Enhanced Supportive Psycho-oncology Canadian Care (ESPOC) Group</b> |                   |                              |                  |                        |                                          |                                                         |                                                                                            |
|----------------------------------------------------------------------------------------|-------------------|------------------------------|------------------|------------------------|------------------------------------------|---------------------------------------------------------|--------------------------------------------------------------------------------------------|
| <b>*First Name and Middle Initial(s)</b>                                               | <b>*Last Name</b> | <b>*Suffix (eg, Jr, III)</b> | Academic Degrees | Institution            | Location (city, state/province, country) | Role or Contribution, eg, chair, principal investigator | Group (if more than 1 Group listed in the byline) and/or Subgroup (eg, Steering Committee) |
| Christopher W                                                                          | Noel              |                              | MD               | Univeristy of Toronto  | Toronto, ON, Canada                      |                                                         |                                                                                            |
| Antoine                                                                                | Eskander          |                              | MD ScM           | Univeristy of Toronto  | Toronto, ON, Canada                      |                                                         |                                                                                            |
| Rinku                                                                                  | Sutradhar         |                              | PhD              | Univeristy of Toronto  | Toronto, ON, Canada                      |                                                         |                                                                                            |
| Alyson                                                                                 | Mahar             |                              | PhD              | Univeristy of Manitoba | Winnipeg, MB, Canada                     |                                                         |                                                                                            |
| Simone N                                                                               | Vigod             |                              | MD MSc           | Univeristy of Toronto  | Toronto, ON, Canada                      |                                                         |                                                                                            |
| Elie                                                                                   | Isenberg-Grzeda   |                              | MDCM             | Univeristy of Toronto  | Toronto, ON, Canada                      |                                                         |                                                                                            |
| James                                                                                  | Bolton            |                              | MD               | Univeristy of Manitoba | Winnipeg, MB, Canada                     |                                                         |                                                                                            |
| Wing                                                                                   | Chan              |                              | MPH              | ICES                   | Toronto, ON, Canada                      |                                                         |                                                                                            |
| Julie                                                                                  | Deleemans         |                              |                  | University of Calgary  | Calgary, AB, Canada                      |                                                         |                                                                                            |
| Ravleen                                                                                | Vasdev            |                              | BSc              | Univeristy of Toronto  | Toronto, ON, Canada                      |                                                         |                                                                                            |
| Victora                                                                                | Zuk               |                              | MSc              | Univeristy of Toronto  | Toronto, ON, Canada                      |                                                         |                                                                                            |
| Barbara                                                                                | Haas              |                              | MD PhD           | Univeristy of Toronto  | Toronto, ON, Canada                      |                                                         |                                                                                            |
| Stephanie                                                                              | Mason             |                              | MD PhD           | Univeristy of Toronto  | Toronto, ON, Canada                      |                                                         |                                                                                            |
| Natalie G                                                                              | Coburn            |                              | MD MPH           | Univeristy of Toronto  | Toronto, ON, Canada                      |                                                         |                                                                                            |
| Julie                                                                                  | Hallet            |                              | MD MSc           | Univeristy of Toronto  | Toronto, ON, Canada                      |                                                         |                                                                                            |
